CORRECTION

# Correction: Observed changes in hydroclimate attributed to human forcing

Dimitris A. Herrera, Benjamin I. Cook, John Fasullo, Kevin J. Anchukaitis, Marc Alessi, Carlos J. Martinez, Colin P. Evans, Xiaolu Li, Kelsey N. Ellis, Rafael Mendez, Toby Ault, Abel Centella, Tannecia S. Stephenson, Michael A. Taylor

[Fig 2](#) is a duplicate of Fig 1. Please see the correct [Fig 2](#) here.

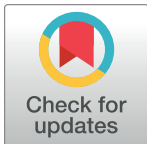

---

## OPEN ACCESS

**Citation:** Herrera DA, Cook BI, Fasullo J, Anchukaitis KJ, Alessi M, Martinez CJ, et al. (2024) Correction: Observed changes in hydroclimate attributed to human forcing. PLOS Clim 3(8): e0000487. <https://doi.org/10.1371/journal.pclm.0000487>

**Published:** August 29, 2024

**Copyright:** © 2024 Herrera et al. This is an open access article distributed under the terms of the [Creative Commons Attribution License](#), which permits unrestricted use, distribution, and reproduction in any medium, provided the original author and source are credited.

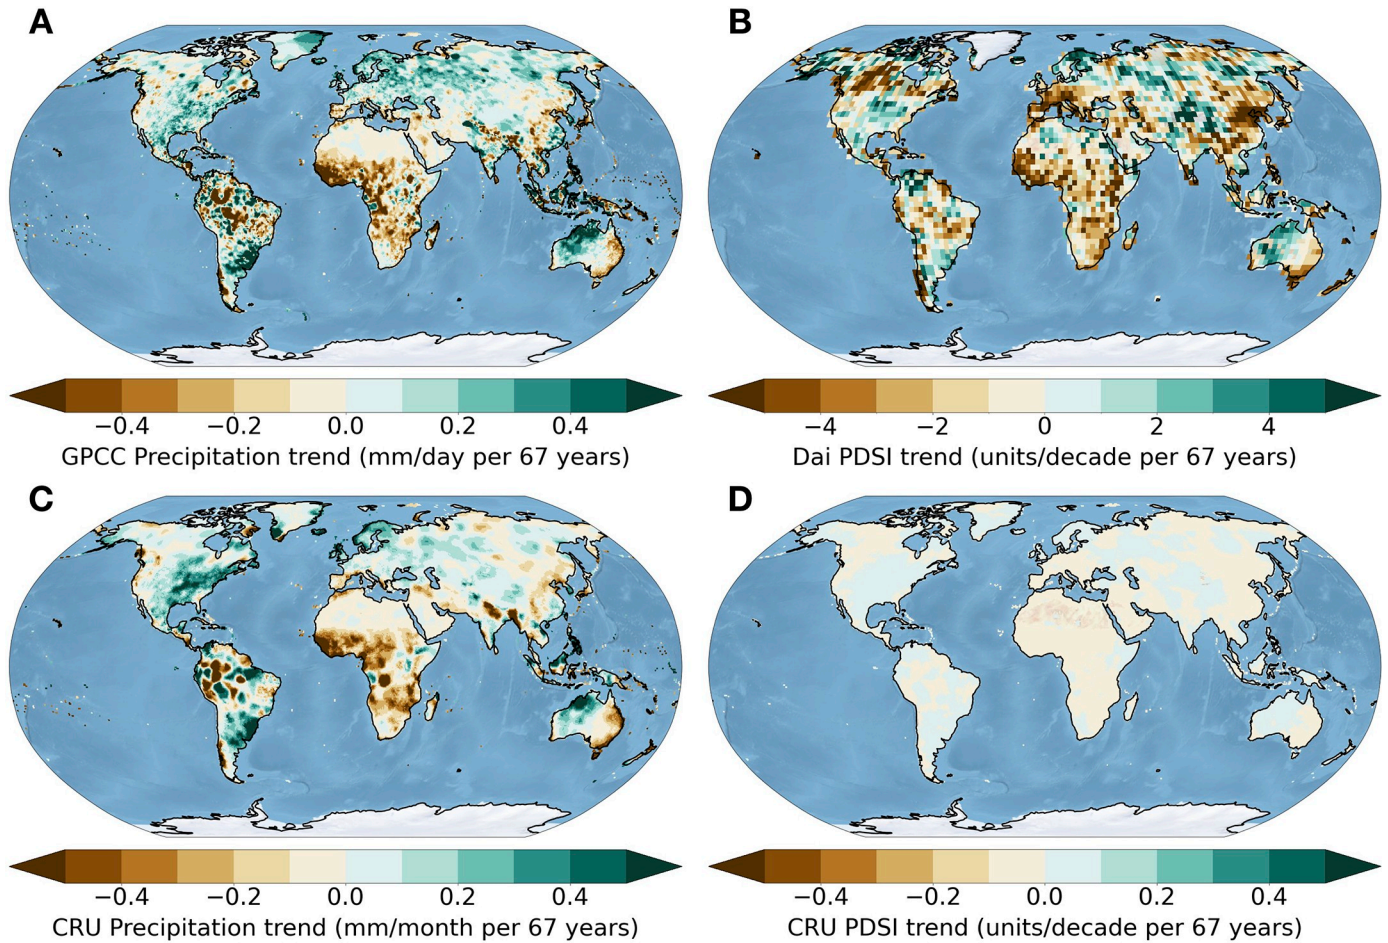

**Fig 2. Trends in observed precipitation and Palmer Drought Severity Index (PDSI).** (A) trends from version 2020 of the Global Precipitation Climatology Centre (GPCCv2020), (B) trends from the “self-calibrated” PDSI dataset from Dai [18], (C) trends from the Climatic Research Unit version TSv 4.01 (CRU TSv.4.01), and (D) “self-calibrated” PDSI dataset from van der Schrier et al. [147]. The trends were calculated over a common period from 1950–2018. While GPCP and CRU precipitation datasets indicate similar patterns in their trends, the PDSI datasets differ in their trends, but most importantly in their magnitudes. In addition to using different input climate data, those PDSI data sets use different calibration periods. For example, the CRU PDSI product uses the whole period (i.e., 1901–2021), and Dai PDSI uses 1950–2000. *This Figure was made with Natural Earth. Free vector and raster map data <https://www.naturalearthdata.com>.*

<https://doi.org/10.1371/journal.pclm.0000487.g001>

## Reference

1. Herrera DA, Cook BI, Fasullo J, Anchukaitis KJ, Alessi M, Martinez CJ, et al. (2023) Observed changes in hydroclimate attributed to human forcing. *PLOS Clim* 2(11): e0000303. <https://doi.org/10.1371/journal.pclm.0000303>
